# Supplementary material for: Structural evidence for the roles of divalent cations in actin polymerization and activation of ATP hydrolysis
Source: PubMed Central journal article supplement — Proc Natl Acad Sci U S A. 2018 Sep 25;115(41):10345–50. doi: 10.1073/pnas.1806394115 (PMC6187199; doi:10.1073/pnas.1806394115), 2018-09-25
Supplement: pnas.1806394115.sapp.pdf [file pnas.1806394115.sapp.pdf]

Supplementary Information for

**Structural evidence for the roles of divalent cations in actin polymerization and activation of ATP hydrolysis.**

**Clement P. M. Scipion, Umesh Ghoshdastider, Fernando J. Ferrer, Tsz-Ying Yuen, Jantana Wongsantichon & Robert C. Robinson**

**Robert C. Robinson**

Email: [rrobinson@imcb.a-star.edu.sg](mailto:rrobinson@imcb.a-star.edu.sg)

**This PDF file includes:**

Figs. S1 to S4  
Tables S1 to S3  
Captions for movies S1 to S3  
Captions for databases S1 to S3  
References for SI reference citations

**Other supplementary materials for this manuscript include the following:**

Movies S1 to S3  
Datasets S1 to S3

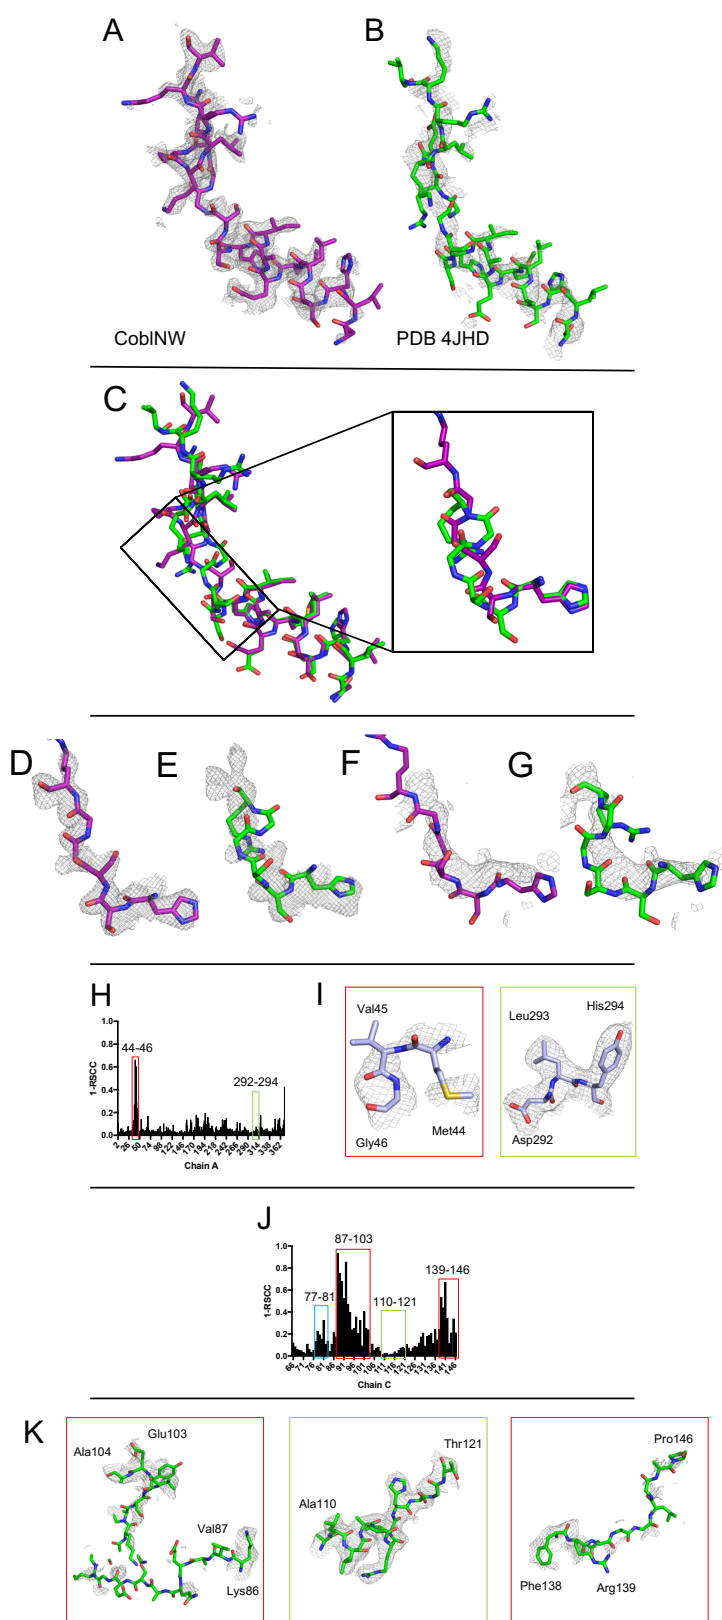

**Fig. S1.** Comparison of the CobINW/actin complex with the Cordon-Bleu/actin complex (PDB 4JHD). (A,B) The WH2 peptides with their corresponding OMIT maps. (C) Alignment of CobINW with the WH2 portion of Cordon-Bleu, including an enlargement of the divergent portion of the structures. (D) The CobINW structure placed in the CobINW OMIT map. (E) The 4JHD structure placed in the CobINW OMIT map. (F) The CobINW structure placed in the 4JHD OMIT map. (G) 4JHD structure placed in the 4JHD OMIT map. (H,J) 1-RSCC (Real-Space Correlation Coefficient) vs residue of 4JHD chains A and C, respectively. (I,K) Representation of the residues framed in H,J. CobINW, purple sticks. 4JHD, green sticks (Cordon-Bleu) and light blue sticks (actin). OMIT maps, grey meshes contoured at 0.5  $\sigma$  (A,B,D-G,I,K). Chain C residues Ser66 – P146 correspond to UniProt accession number Q5NBX1 residues Ser1184 – P1264).

Comment: On superimposing the CoblNW structure onto the PDB 4JHD structure, we observed that the CoblNW structure described the 4JHD electron density better than the 4JHD structure (Fig S1, compare F and G). Therefore, an EDS analysis was performed on 4JHD structure and electron density (1). The real-space correlation coefficient (RSCC) confirmed a divergence between the structure and the density (Fig S1J, blue frame and Fig S1G). The analysis of the rest of 4JHD showed that the majority of the actin (chain A) exhibited a good structure-to-density correlation (Fig S1H), which was confirmed by plotting electron density maps as examples (Fig S1I, green frame). Nevertheless, some parts of actin showed poor density, and thus poor RSCC (Fig S1H,I, red frames). This corresponds to the DNase I binding loop, which is usually disordered in G-actin structures. Finally, the Cordon-Bleu (chain C) residues 87 to 103, as well as residues 139 to 146, showed no significant electron density (Fig S1J,K, red frames). This indicates that the linker between the actin-binding WH2 domains is disordered, as is the ATP cleft-interacting C-terminal tail of the second WH2 domain. Thus, these regions of the 4JHD should not be used for extrapolating biological implications. This analysis corroborates recent studies that re-analysed a Lmod2 polypeptide bridging two WH2 domains (2) for which no electron density was observed for the linker region on re-analysis (3,4).

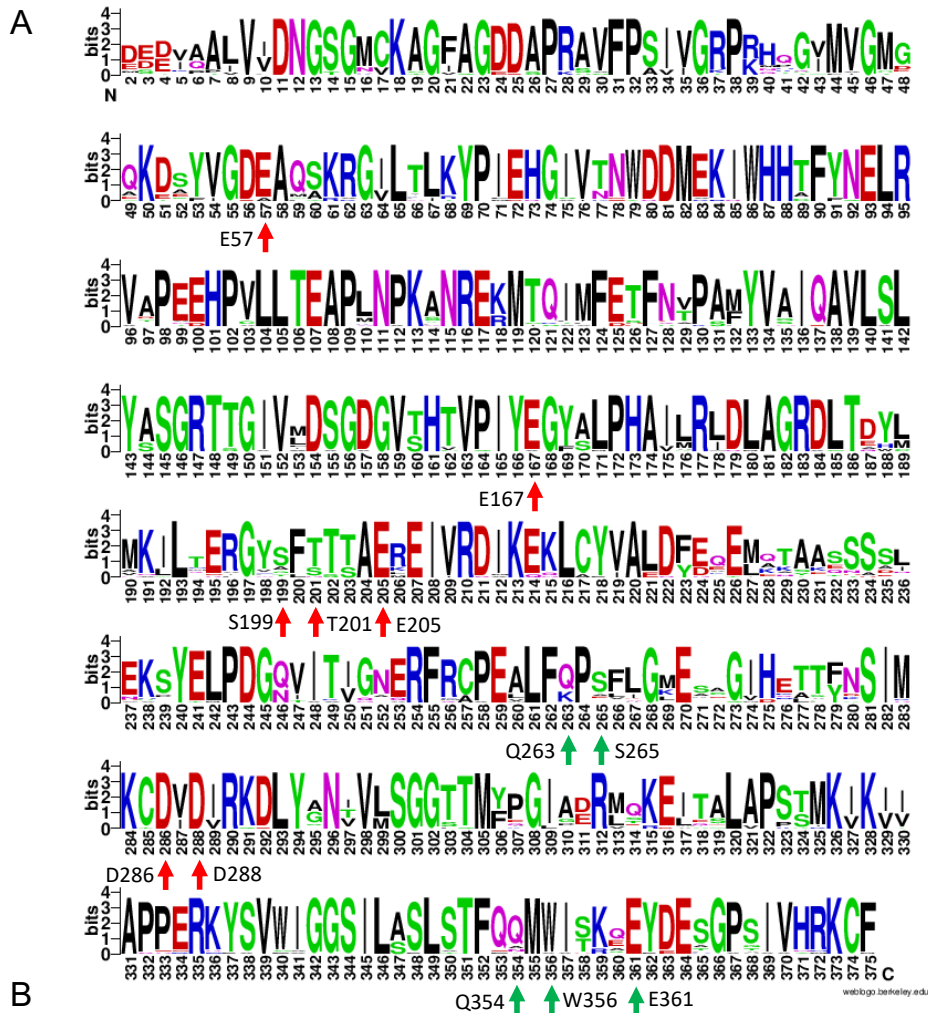

**Fig. S2.** The actin amino acid sequence is highly conserved in eukaryotes. (A) Sequence Logo of aligned actin sequences from different organisms. Residues indicated by arrows indicate the residues highlighted in Fig. 2. The colours of the arrows match those of the boxes in Fig. 2 (B) White background; list of organisms with their respective UniProt access numbers used for alignments showed in (A). Grey background; list of Asgard archaea actins that show amino acid conservation in the E57/167 (stiffness), D288/D286/E205 (polymerization), and W356/E631 sites. This suggests an evolutionary conserved role for these sites. (5,6) This suggests an evolutionary conserved role for these sites (5,6). Alignments were performed using Clustal Omega (7) and sequences logo was created using WebLogo (8,9).

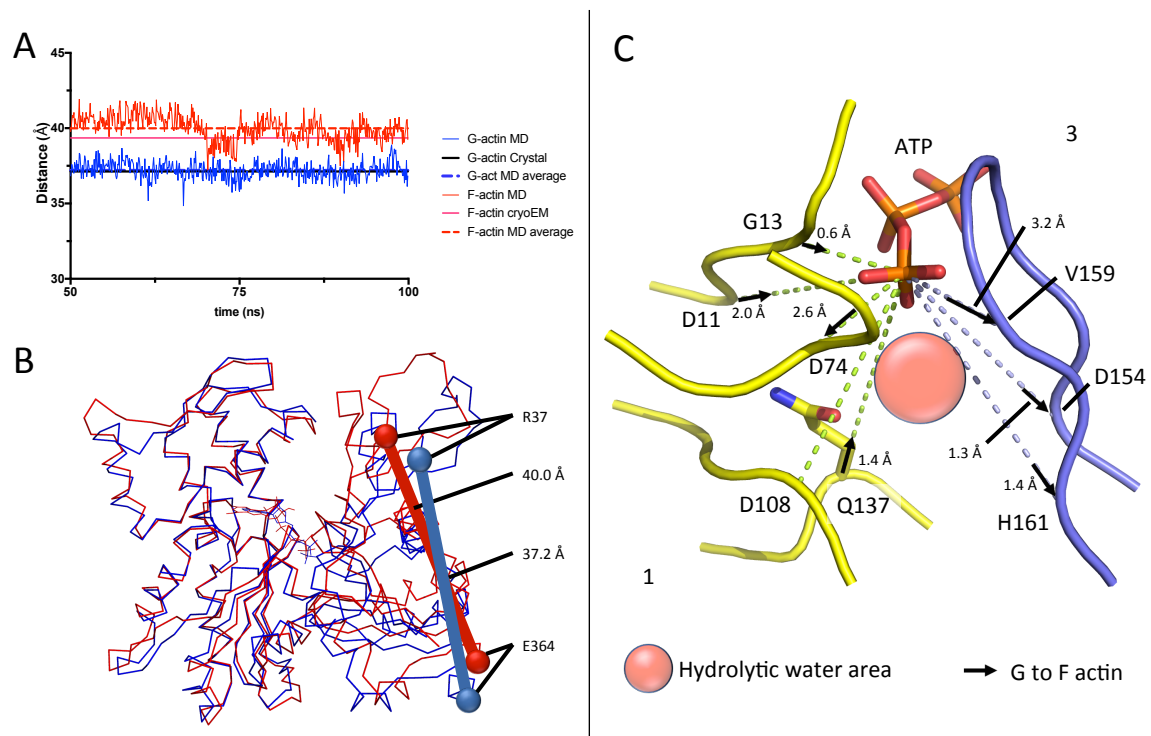

**Fig. S3.** General analyses of G and F-actin MD simulations. (A) Distance between residues 364 (subdomain 1) to 37 (subdomain 2). G-actin crystal, distance in native G-actin crystal structure (PDB accession code 3HBT, (10)). F-actin cryoEM, distance in latest cryoEM structure (PDB accession 5OOE, (11)). (B) Superimposition of G and F-actin models used in morphing analysis (Fig 4, Supplementary videos 1, 2 and 3), indicating the distance shown in Fig. S3A. The stability of these distances in Fig. S3A indicates that G-actin remains G-actin, and F-actin remains F-actin, during the time course of the simulations. (C) Movement in residues lining the ATP cleft from the average positions in the G-actin structures to the average positions in the last 50 ns of the F-actin MD simulation under 1 mM MgCl<sub>2</sub> and 120 KCl buffer conditions. Subdomain 1, yellow. Subdomain 3, blue.

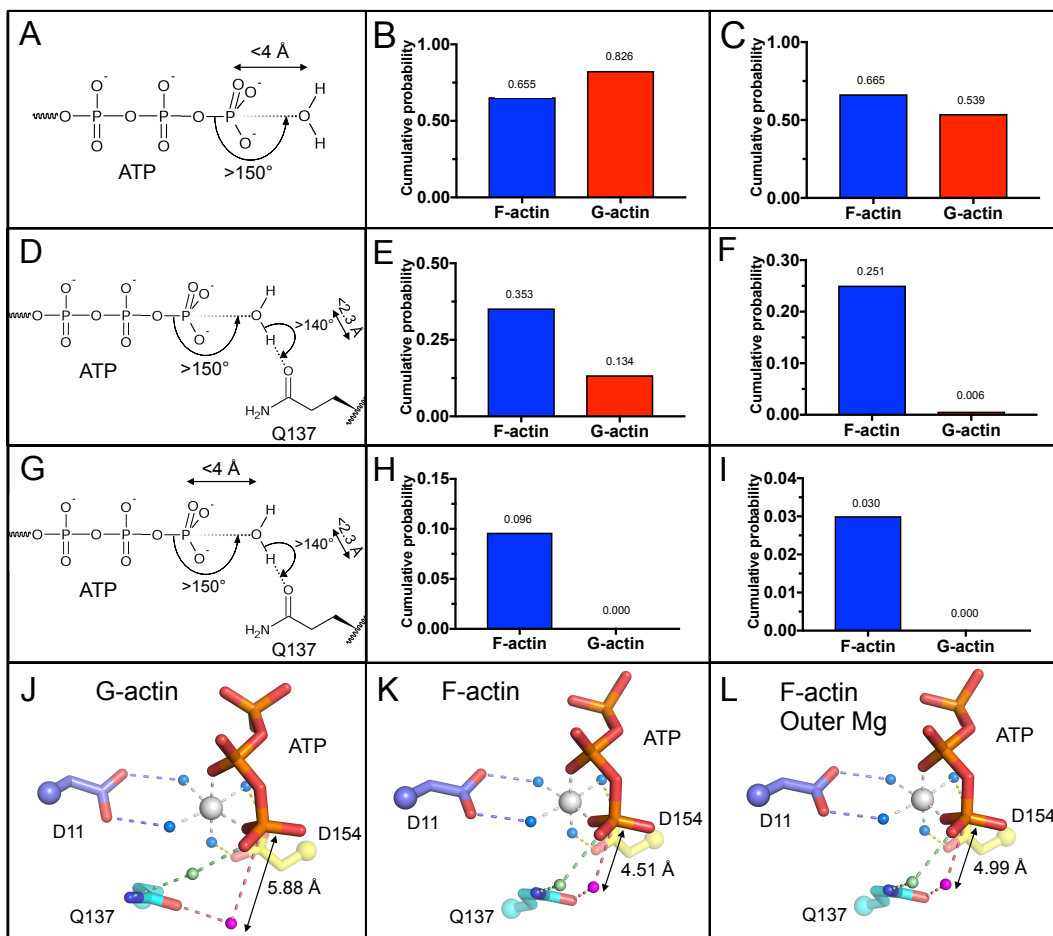

**Fig. S4.** MD analysis of water molecules close to the ATP  $\gamma$ -phosphorus and Gln137 in high 150 mM  $\text{MgCl}_2$  conditions. (A,D,G) Representation of analysis conditions applied around ATP and Gln137. (B,C,E,F,H,I) Cumulative probability of water molecules with applied conditions from A,D,G. (B,E,H) Starting model included the ATP magnesium ion. (C,F,I) Starting model included the ATP magnesium ion and the surface bound magnesium ions from Figure 2, labeled “outer Mg”. (J) G-actin model, resulting from the combination of actin-DNaseI structure (PDB accession code 1ATN, (12)) and ATP and ATP-bound magnesium of PDB accession code 2V52 (13). (K,L) Typical snapshots of MD simulation frame satisfying all conditions from (G). ATP and actin, sticks. Water, blue, green and purple spheres. Simulations were performed in 150 mM  $\text{MgCl}_2$  conditions. Chemical sketches were created using ACD/ChemSketch version 2016.2.2, Advanced Chemistry Development, Inc., Toronto, ON, Canada, www.acdlabs.com.

*Oryctolagus cuniculus* Actin–CobINW<sup>‡</sup>

|                                   |                                    |
|-----------------------------------|------------------------------------|
| Data collection                   |                                    |
| Space group                       | C 2                                |
| Cell dimension                    |                                    |
| a, b, c (Å)                       | 174.9, 40.8, 109.0                 |
| $\alpha$ , $\beta$ , $\gamma$ (°) | 90.0, 101.8, 90.0                  |
| Resolution (Å)                    | 29.8 - 2.0 (2.07 - 2.00)*          |
| Rmerge (%)                        | 11.3 (52.2)*                       |
| Rmeas (%)                         | 13.3 (63.0)*                       |
| Mean I/sigma(I)                   | 7.6 (1.4)*                         |
| Completeness (%)                  | 97 (98)*                           |
| Redundancy                        | 3.6 (3.1)*                         |
| CC1/2                             | 0.995 (0.806)*                     |
| Refinement                        |                                    |
| No. of reflections                | 50,252 (4,115)*                    |
| Rwork/Rfree                       | 19.9/24.2 (27.7/29.6)*             |
| No. of atoms                      |                                    |
| Actin                             | 5,601                              |
| mCobINle-WH2                      | 334                                |
| ATP, Ca <sup>2+</sup>             | 62, 7                              |
| Waters                            | 615                                |
| B factors (Å <sup>2</sup> )       |                                    |
| Actin/mCobINle-WH2                | 29.5                               |
| ATP, Ca <sup>2+</sup>             | 19.1                               |
| Water                             | 35.3                               |
| RMSD                              |                                    |
| Bonds (Å)                         | 0.010                              |
| Angles (°)                        | 1.40                               |
| Molprobrity statistics            |                                    |
| Clashscore, all atoms             | 3.31                               |
| Poor rotamers (%)                 | 1.42                               |
| Ramachandran outliers (%)         | 0.0                                |
| Ramachandran favored (%)          | 97.97                              |
| Molprobrity score                 | 1.24 (99 <sup>th</sup> percentile) |
| C $\beta$ deviations > 0.25Å (%)  | 0.0                                |
| Bad backbone bonds (%)            | 0.0                                |
| Bad backbone angles (%)           | 0.0                                |

<sup>‡</sup> PDB ID code 5YPU

\* Values in parentheses are for the highest resolution shell

**Table S1.** Data collection and refinement statistics. Each crystallographic asymmetric unit contains 2 copies of the complex. The ordered residues of actin comprise amino acids Thr5-Gly36 and Ser52-Arg372, consistent with other reported actin crystal structures, where the N-terminus (residues 1-4) and DNase I binding loop (residues 37-51) are disordered and the C-terminus (residues 373-375) is sometimes not observed. The ordered region of the WH2-motif peptide comprises the entire peptide (Ser1184-Val1205).

| Number | PDB ID | Site identified                 | Actin                                              | Ligand                                   | Cation           | Nucleotide | Resolution (Å) | Ref  |
|--------|--------|---------------------------------|----------------------------------------------------|------------------------------------------|------------------|------------|----------------|------|
| 1      | 4PKH   | E167                            | Alpha skeletal muscle                              | Nterm Tropomodulin-1 Gelsolin chimera    | Ca <sup>2+</sup> | ADP        | 2.15           | (14) |
| 2      | 4PKI   | E167                            | Alpha skeletal muscle                              | Cterm Tropomodulin-1 Gelsolin chimera    | Ca <sup>2+</sup> | ATP        | 2.3            | (14) |
| 3      | 4CBU   | E167                            | Plasmodium falciparum actin I                      | Gelsolin                                 | Ca <sup>2+</sup> | ATP        | 1.3            | (15) |
| 4      | 4CBW   | E167                            | Plasmodium berghei I with D-loop from muscle actin | Gelsolin                                 | Ca <sup>2+</sup> | ATP        | 2.5            | (15) |
| 5      | 4K41   | Q263/S265                       | Alpha skeletal muscle                              | Kabimamide C                             | Ca <sup>2+</sup> | ATP        | 1.4            | (16) |
| 6      | 1T44   | E167                            | Alpha skeletal muscle                              | Chimera of Gelsolin G1 and C-term Tb4    | Ca <sup>2+</sup> | ATP        | 2.0            | (17) |
| 7      | 1MDU   | E167                            | Chicken actin                                      | Gelsolin G1                              | Ca <sup>2+</sup> | ATP        | 2.2            | (18) |
| 8      | 4CBX   | E167                            | Plasmodium berghei actin II                        | Gelsolin                                 | Ca <sup>2+</sup> | ATP        | 2.2            | (15) |
| 9      | 3M6G   | E205, Q354/W356/E361, V30       | Alpha skeletal muscle                              | Lobophorolide                            | Mg <sup>2+</sup> | ATP        | 2.0            | (19) |
| 10     | 2HMP   | E125, E125/N128, V30            | Alpha skeletal muscle                              | Cleaved with ECP32                       | Sr <sup>2+</sup> | ATP        | 1.9            | (20) |
| 11     | 2VYP   | D286/D288, E167, Q354/W356/E361 | Alpha skeletal muscle                              | Myxobacterial rhizopodin                 | Ca <sup>2+</sup> | ATP        | 2.32           | (21) |
| 12     | 1EFH   | S271                            | Acanthamoeba actin                                 | Spir domain D                            | Ca <sup>2+</sup> | ADP        | 2.48           | (22) |
| 13     | 1C0G   | E167                            | Dictyostelium/Tetrahymena chimera actin            | Gelsolin G1                              | Ca <sup>2+</sup> | ATP        | 2.0            | (23) |
| 14     | 1DEJ   | E167                            | Dictyostelium/Tetrahymena chimera actin            | Gelsolin G1                              | Ca <sup>2+</sup> | ATP        | 2.4            | (23) |
| 15     | 1EQY   | E167                            | Alpha skeletal muscle                              | Gelsolin G1                              | Ca <sup>2+</sup> | ATP        | 2.3            | (24) |
| 16     | 1C0F   | E167                            | Dictyostelium actin                                | Gelsolin G1                              | Ca <sup>2+</sup> | ATP        | 2.4            | (23) |
| 17     | 3A5O   | E167                            | Dictyostelium actin                                | Gelsolin G1                              | Ca <sup>2+</sup> | ATP        | 2.4            | (25) |
| 18     | 3A5N   | E167                            | Dictyostelium actin                                | Gelsolin G1                              | Ca <sup>2+</sup> | ATP        | 2.36           | (25) |
| 19     | 2FF6   | E167                            | Alpha skeletal muscle                              | Gelsolin G1, Ciboulot D2                 | Ca <sup>2+</sup> | ATP        | 2.05           | (26) |
| 20     | 1ESV   | E167                            | Alpha skeletal muscle                              | Gelsolin G1, Latrunculin                 | Ca <sup>2+</sup> | ATP        | 2.0            | (27) |
| 21     | 2FF3   | E167                            | Alpha skeletal muscle                              | Nterm WASP V2                            | Ca <sup>2+</sup> | ATP        | 2.0            | (26) |
| 22     | 3A5L   | E167                            | Dictyostelium actin                                | Gelsolin G1                              | Mg <sup>2+</sup> | ADP        | 2.4            | (25) |
| 23     | 3UB5   | S199/T201/E205                  | Cow cytoplasmic 1                                  | Profilin (open)                          | Ca <sup>2+</sup> | ATP        | 2.2            | (28) |
| 24     | 3U4L   | D288                            | Cow cytoplasmic 1                                  | Profilin                                 | Ca <sup>2+</sup> | ATP        | 2.4            | (28) |
| 25     | 2FXU   | Q263/S265 & D286/D288           | Alpha skeletal muscle                              | Bistramide A                             | Ca <sup>2+</sup> | ATP        | 1.35           | (29) |
| 26     | 1J6Z   | E205 & Q354/W356/E361           | Alpha skeletal muscle                              | Rhodamine                                | Ca <sup>2+</sup> | ADP        | 1.54           | (30) |
| 27     | 2ASP   | Q263/S265                       | Alpha skeletal muscle                              | Reidispongiolide C                       | Ca <sup>2+</sup> | ATP        | 1.64           | (31) |
| 28     | 2ASM   | Q263/S265                       | Alpha skeletal muscle                              | Reidispongiolide A                       | Ca <sup>2+</sup> | ATP        | 1.6            | (31) |
| 29     | 2QOR   | Q263/S265                       | Alpha skeletal muscle                              | Pectenotoxin-2                           | Ca <sup>2+</sup> | ATP        | 1.7            | (32) |
| 30     | 2QOU   | Q263/S265                       | Alpha skeletal muscle                              | Pectenotoxin-2, Latrunculin B            | Ca <sup>2+</sup> | ATP        | 1.45           | (32) |
| 31     | 2HF3   | Q263/S265                       | Drosophila Actin 5C                                |                                          | Ca <sup>2+</sup> | ADP        | 1.8            | (33) |
| 32     | 3EKS   | Q263/S265                       | Drosophila Actin 5C                                | Cytochalasin D                           | Ca <sup>2+</sup> | ATP        | 1.8            | (34) |
| 33     | 1NWK   | Q263/S265 & Q354/W356/E361      | Alpha skeletal muscle                              |                                          | Ca <sup>2+</sup> | AMPNP      | 1.85           | (35) |
| 34     | 2HF4   | Q263/S265                       | Drosophila Actin 5C                                |                                          | Ca <sup>2+</sup> | ATP        | 1.8            | (33) |
| 35     | 3EKU   | Q263/S265                       | Drosophila Actin 5C                                | Cytochalasin D                           | Ca <sup>2+</sup> | ATP        | 2.5            | (34) |
| 36     | 3EL2   | Q263/S265                       | Drosophila Actin 5C                                | Anti-parallel dimer                      | Ca <sup>2+</sup> | ATP        | 2.5            | (34) |
| 37     | 2A5X   | Q263/S265                       | Alpha skeletal muscle                              | Cross-linked actin dimer                 | Ca <sup>2+</sup> | AMPNP      | 2.49           | (36) |
| 38     | 4Z94   | E167/G90/D85                    | Alpha skeletal muscle                              | Tropomodulin-1 and Leiomodin-1 chimera   | Ca <sup>2+</sup> | ATP        | 2.4            | (37) |
| 39     | 5UBO   | E167                            | Mical oxidized Alpha skeletal muscle               | Gelsolin G1                              | Ca <sup>2+</sup> | ATP        | 2.39           | (38) |
| 40     | 5YPU   | D187, D286/D288, D363           | Alpha skeletal muscle                              | Cordon-Bleu MET1190NLE WH2-motif peptide | Ca <sup>2+</sup> | ATP        | 2.0            | -    |

**Table S2.** Actin crystal structures reveal G-actin bound divalent cations



| PDB ID                                                    | Cation           | Nucleotide | Resolution (Å) | 13Cα        | 11Cα        | 137Cα       | 108Cα       | 74Cα         | 161Cα        | 159Cα        | 154Cα       | 137O <sub>β</sub> |
|-----------------------------------------------------------|------------------|------------|----------------|-------------|-------------|-------------|-------------|--------------|--------------|--------------|-------------|-------------------|
| 4PKI                                                      | Ca <sup>2+</sup> | ATP        | 2.3            | 4.59        | 9.87        | 9.7         | 8.44        | 5.06         | 9.29         | 5.09         | 7.90        | 6.09              |
| 4CBU                                                      | Ca <sup>2+</sup> | ATP        | 1.3            | 4.58        | 9.84        | 9.69        | 8.36        | 5.12         | 9.33         | 5.13         | 8.17        | 6.12              |
| 4CBW                                                      | Ca <sup>2+</sup> | ATP        | 2.5            | 4.62        | 9.65        | 9.59        | 8.12        | 5.15         | 9.20         | 5.35         | 7.99        | 5.7               |
| 4K41                                                      | Ca <sup>2+</sup> | ATP        | 1.4            | 4.61        | 9.90        | 9.45        | 8.34        | 5.17         | 9.36         | 5.07         | 8.07        | 5.93              |
| 1T44                                                      | Ca <sup>2+</sup> | ATP        | 2.0            | 4.59        | 9.89        | 9.6         | 8.45        | 5.15         | 9.57         | 5.18         | 8.17        | 6.06              |
| 1MDU                                                      | Ca <sup>2+</sup> | ATP        | 2.2            | 4.62        | 9.95        | 9.78        | 8.4         | 5.29         | 9.32         | 5.12         | 8.06        | 6.15              |
| 1MDU                                                      | Ca <sup>2+</sup> | ATP        | 2.2            | 4.54        | 10.02       | 9.82        | 8.43        | 5.25         | 9.31         | 4.96         | 8.05        | 6.28              |
| 4CBX                                                      | Ca <sup>2+</sup> | ATP        | 2.2            | 4.63        | 9.94        | 9.85        | 8.49        | 5.16         | 8.97         | 5.10         | 8.13        | 6.16              |
| 3M6G                                                      | Mg <sup>2+</sup> | ATP        | 2.0            | 4.78        | 9.92        | 10.19       | 8.28        | 5.31         | 9.12         | 5.07         | 7.97        | 5.91              |
| 3M6G                                                      | Mg <sup>2+</sup> | ATP        | 2.0            | 4.74        | 8.77        | 9.51        | 8.17        | 5.22         | 9.22         | 5.20         | 8.09        | 5.97              |
| 2HMP                                                      | Sr <sup>2+</sup> | ATP        | 1.9            | 4.66        | 10.06       | 9.97        | 8.54        | 5.27         | 9.30         | 5.36         | 8.08        | 6.49              |
| 2HMP                                                      | Sr <sup>2+</sup> | ATP        | 1.9            | 4.64        | 9.97        | 9.85        | 8.45        | 5.17         | 9.42         | 5.23         | 8.15        | 6.39              |
| 2VYP                                                      | Ca <sup>2+</sup> | ATP        | 2.32           | 4.52        | 9.79        | 9.28        | 8.13        | 5.19         | 9.40         | 5.15         | 8.03        | 5.84              |
| 2VYP                                                      | Ca <sup>2+</sup> | ATP        | 2.32           | 4.82        | 10.05       | 9.60        | 8.28        | 5.38         | 9.21         | 5.21         | 7.79        | 6.12              |
| 1COG                                                      | Ca <sup>2+</sup> | ATP        | 2.0            | 4.46        | 9.82        | 9.61        | 8.28        | 5.12         | 9.38         | 5.14         | 8.2         | 5.92              |
| 1DEJ                                                      | Ca <sup>2+</sup> | ATP        | 2.4            | 4.59        | 9.88        | 9.63        | 8.33        | 5.16         | 9.40         | 5.17         | 8.18        | 5.95              |
| 1EQY                                                      | Ca <sup>2+</sup> | ATP        | 2.3            | 4.53        | 9.78        | 9.50        | 8.56        | 5.22         | 9.51         | 5.01         | 8.15        | 5.68              |
| 1C0F                                                      | Ca <sup>2+</sup> | ATP        | 2.4            | 4.63        | 9.97        | 9.69        | 8.35        | 5.10         | 9.34         | 5.09         | 8.22        | 6.11              |
| 3A5O                                                      | Ca <sup>2+</sup> | ATP        | 2.4            | 4.59        | 10.00       | 9.93        | 8.52        | 5.12         | 9.49         | 5.07         | 8.14        | 6.12              |
| 3A5N                                                      | Ca <sup>2+</sup> | ATP        | 2.36           | 4.54        | 9.96        | 9.89        | 9.13        | 5.16         | 9.33         | 5.04         | 8.15        | 6.28              |
| 2FF6                                                      | Ca <sup>2+</sup> | ATP        | 2.05           | 4.57        | 9.84        | 9.59        | 8.28        | 5.06         | 9.38         | 5.06         | 8.13        | 6.05              |
| 1ESV                                                      | Ca <sup>2+</sup> | ATP        | 2.0            | 4.47        | 9.63        | 9.54        | 8.37        | 4.92         | 9.45         | 5.03         | 8.18        | 6.02              |
| 2FF3                                                      | Ca <sup>2+</sup> | ATP        | 2.0            | 4.53        | 9.90        | 9.75        | 8.36        | 5.14         | 9.35         | 5.13         | 8.08        | 6.25              |
| 3UB5                                                      | Ca <sup>2+</sup> | ATP        | 2.2            | 5.39        | 11.33       | 11.17       | 9.36        | 5.58         | 10.88        | 6.58         | 9.88        | 7.91              |
| 3U4L                                                      | Ca <sup>2+</sup> | ATP        | 2.4            | 4.37        | 9.49        | 9.17        | 7.97        | 5.36         | 9.34         | 5.66         | 7.95        | 5.56              |
| 2FXU                                                      | Ca <sup>2+</sup> | ATP        | 1.35           | 4.61        | 9.85        | 9.49        | 8.30        | 5.07         | 9.36         | 5.10         | 8.05        | 5.96              |
| 2ASP                                                      | Ca <sup>2+</sup> | ATP        | 1.64           | 4.60        | 9.91        | 9.86        | 7.25        | 5.12         | 9.47         | 5.22         | 8.18        | 5.98              |
| 2ASM                                                      | Ca <sup>2+</sup> | ATP        | 1.6            | 4.65        | 9.92        | 9.47        | 8.37        | 5.15         | 9.37         | 5.15         | 8.11        | 6.04              |
| 2Q0R                                                      | Ca <sup>2+</sup> | ATP        | 1.7            | 4.51        | 9.77        | 9.37        | 8.32        | 5.16         | 9.46         | 5.20         | 8.15        | 5.83              |
| 2Q0U                                                      | Ca <sup>2+</sup> | ATP        | 1.45           | 4.52        | 9.76        | 9.26        | 8.22        | 5.11         | 9.51         | 5.19         | 8.14        | 5.69              |
| 3EKS                                                      | Ca <sup>2+</sup> | ATP        | 1.8            | 4.50        | 9.80        | 9.66        | 8.51        | 5.19         | 9.55         | 5.40         | 8.37        | 6.88              |
| 2HF4                                                      | Ca <sup>2+</sup> | ATP        | 1.8            | 4.63        | 9.99        | 9.69        | 8.43        | 5.33         | 9.40         | 5.26         | 8.14        | 6.08              |
| 3EKU                                                      | Ca <sup>2+</sup> | ATP        | 2.5            | 4.65        | 9.91        | 9.71        | 8.30        | 5.49         | 9.40         | 5.21         | 8.27        | 6.62              |
| 3EL2                                                      | Ca <sup>2+</sup> | ATP        | 2.5            | 4.56        | 9.88        | 9.75        | 8.26        | 5.44         | 9.33         | 5.17         | 8.13        | 6.83              |
| 4Z94                                                      | Ca <sup>2+</sup> | ATP        | 2.4            | 4.51        | 9.77        | 9.53        | 8.41        | 5.04         | 9.30         | 5.11         | 8.03        | 6.16              |
| 5UBO                                                      | Ca <sup>2+</sup> | ATP        | 2.39           | 4.55        | 9.85        | 9.63        | 8.37        | 5.06         | 9.39         | 5.06         | 8.00        | 6.04              |
|                                                           |                  |            | AVERAGE        | <b>4.61</b> | <b>9.88</b> | <b>9.69</b> | <b>8.36</b> | <b>5.19</b>  | <b>9.40</b>  | <b>5.20</b>  | <b>8.15</b> | <b>6.14</b>       |
| F-actin MgOuter MD<br>(1mM MgCl <sub>2</sub> , 120mM KCl) | Mg <sup>2+</sup> | ATP        | -              | <b>4.00</b> | <b>7.86</b> | <b>8.30</b> | <b>8.35</b> | <b>7.13</b>  | <b>11.28</b> | <b>8.43</b>  | <b>9.45</b> | <b>5.17</b>       |
|                                                           |                  |            | DIFFERENCE     | <b>0.61</b> | <b>2.02</b> | <b>1.39</b> | <b>0.01</b> | <b>-1.94</b> | <b>-1.88</b> | <b>-3.23</b> | <b>-1.3</b> | <b>0.97</b>       |

**Table S3.** Distances in G-actin crystal structures from ATP P<sub>γ</sub> to different atoms. AVERAGE, average of distances in crystal structures. DIFFERENCE, difference between the crystal structure average and the MD average distances.

**Movie S1.** Morphing from G to F-actin, overall view. Actin subdomains 1 and 2, light blue ribbons. Actin subdomains 3 and 4, yellow ribbons. Actin subdomains 1 and 3 interface  $\alpha$ -helix, cyan cartoon. ATP, sticks. Magnesium, grey sphere. The MD initial model was used for G-actin. For F-actin, a typical snapshot of an MD frame bearing all the conditions from Fig. 4E was selected. The LSQMAN software package was used to generate the morphs (<http://xray.bmc.uu.se/usf/>).

**Movie S2.** Morphing from G to F-actin, overall side-view. Actin subdomains 1 and 2, light blue ribbons. Actin subdomains 3 and 4, yellow ribbons. Actin subdomains 1 and 3 interface  $\alpha$ -helix, cyan cartoon. ATP, sticks. Magnesium ion, grey sphere.

**Movie S3.** Morphing from G to F-actin, close-up around ATP. ATP, sticks. Magnesium ion, grey sphere. Asp11, light blue sticks. Gln137, cyan sticks. Asp154, yellow sticks. Water, blue, green and purple spheres.

**Additional Dataset PDB S1 (separate file)**

Initial model for the F-actin MD simulations including ATP and magnesium ions.

**Additional Dataset PDB S2 (separate file)**

F-actin after completion of the MD simulation (t=0 ns). Conditions of 1 mM MgCl<sub>2</sub> and 120 mM KCl were used.

**Additional Dataset PDB S3 (separate file)**

F-actin after completion of the MD simulation (t=100 ns). Conditions of 1 mM MgCl<sub>2</sub> and 120 mM KCl were used.

## References

1. Kleywegt GJ, Harris MR, Zou JY, Taylor TC, Wählby A, Jones TA. The Uppsala Electron-Density Server. *Acta Crystallogr Sect D Biol Crystallogr*. 2004;60(12 I):2240–9.
2. Chen X, Ni F, Kondrashkina E, Ma J, Wang Q. Mechanisms of leiomodin 2-mediated regulation of actin filament in muscle cells. *Proc Natl Acad Sci [Internet]*. 2015;112(41):12687–92. Available from: <http://www.pnas.org/lookup/doi/10.1073/pnas.1512464112>
3. Boczkowska M, Yurtsever Z, Rebowski G, Eck MJ, Dominguez R. Crystal Structure of Leiomodin 2 in Complex with Actin: A Structural and Functional Reexamination. *Biophys J*. 2017;113(4):889–99.
4. Pollard TD. A Third Look at the Structure of Leiomodin Bound to Actin. Vol. 113, *Biophysical Journal*. 2017. p. 762–4.
5. Spang A, Saw JH, Jørgensen SL, Zaremba-Niedzwiedzka K, Martijn J, Lind AE, et al. Complex archaea that bridge the gap between prokaryotes and eukaryotes. *Nature*. 2015;521(7551):173–9.
6. Zaremba-Niedzwiedzka K, Caceres EF, Saw JH, Bäckström Di, Juzokaite L, Vancaester E, et al. Asgard archaea illuminate the origin of eukaryotic cellular complexity. *Nature*. 2017;541(7637):353–8.
7. Sievers F, Wilm A, Dineen D, Gibson TJ, Karplus K, Li W, et al. Fast, scalable generation of high-quality protein multiple sequence alignments using Clustal Omega. *Mol Syst Biol*. 2011;7.
8. Schneider TD, Stephens RM. Sequence logos: A new way to display consensus sequences. *Nucleic Acids Res*. 1990;18(20):6097–100.
9. Crooks GE, Hon G, Chandonia JM, Brenner SE. WebLogo: A sequence logo generator. *Genome Res*. 2004;14(6):1188–90.
10. Wang H, Robinson RC, Burtnick LD. The structure of native G-actin. *Cytoskeleton*. 2010;67(7):456–65.
11. Merino F, Pospich S, Funk J, Wagner T, Küllmer F, Arndt H-D, et al. Structural transitions of F-actin upon ATP hydrolysis at near-atomic resolution revealed by cryo-EM. *Nat Struct Mol Biol [Internet]*. 2018; Available from: <https://www.nature.com/articles/s41594-018-0074-0.pdf%0Ahttp://www.nature.com/articles/s41594-018-0074-0>
12. Kabsch W, Mannherz HG, Suck D, Pai EF, Holmes KC. Atomic structure of the actin:DNase I complex. *Nature*. 1990 Sep;347(6288):37–44.
13. Mouilleron S, Guettler S, Langer CA, Treisman R, McDonald NQ. Molecular basis for G-actin binding to RPEL motifs from the serum response factor coactivator MAL. *EMBO J*. 2008;27(23):3198–208.
14. Rao JN, Madasu Y, Dominguez R. Mechanism of actin filament pointed-end capping by tropomodulin. *Science (80- ) [Internet]*. 2014;345(6195):463–7. Available from: <http://www.sciencemag.org/cgi/doi/10.1126/science.1256159>
15. Vahokoski J, Bhargav SP, Desfosses A, Andreadaki M, Kumpula EP, Martinez SM, et al. Structural Differences Explain Diverse Functions of Plasmodium Actins. *PLoS Pathog*. 2014;10(4).
16. Pereira JH, Petchprayoon C, Hoepker AC, Moriarty NW, Fink SJ, Cecere G, et al. Structural and biochemical studies of actin in complex with synthetic macrolide tail analogues. *ChemMedChem*. 2014;9(10):2286–93.
17. Irobi E, Aguda AH, Larsson M, Guerin C, Yin HL, Burtnick LD, et al. Structural basis of actin sequestration by thymosin- $\beta$ 4: implications for WH2 proteins. *EMBO J [Internet]*. 2004;23(18):3599–608. Available from: <http://emboj.embopress.org/cgi/doi/10.1038/sj.emboj.7600372>
18. Dawson JF, Sablin EP, Spudich JA, Fletterick RJ. Structure of an F-actin trimer disrupted by gelsolin and implications for the mechanism of severing. *J Biol Chem*. 2003;278(2):1229–38.
19. Blain JC, Mok YF, Kubanek J, Allingham JS. Two molecules of lobophorolide cooperate to stabilize an actin dimer using both their “ring” and “tail” region. *Chem Biol*. 2010;17(8):802–7.
20. Klenchin VA, Khaitlina SY, Rayment I. Crystal Structure of Polymerization-Competent Actin. *J Mol Biol*. 2006;362(1):140–50.
21. Hagelueken G, Albrecht SC, Steinmetz H, Jansen R, Heinz DW, Kalesse M, et al. The absolute configuration of rhizopodin and its inhibition of actin polymerization by dimerization. *Angew Chemie - Int Ed*. 2009;48(3):595–8.
22. Pedersen LC, Petrotchenko E V., Negishi M. Crystal structure of SULT2A3, human hydroxysteroid sulfotransferase. *FEBS Lett*. 2000;475(1):61–4.

23. Matsuura Y, Stewart M, Kawamoto M, Kamiya N, Saeki K, Yasunaga T, et al. Structural basis for the higher Ca<sup>2+</sup>-activation of the regulated actin-activated myosin ATPase observed with Dictyostelium/Tetrahymena actin chimeras1 | Edited by A. Klug. *J Mol Biol* [Internet]. 2000;296(2):579–95. Available from: <http://www.sciencedirect.com/science/article/pii/S0022283699934678>
24. McLaughlin PJ, Gooch JT, Mannherz H-G, Weeds AG. Structure of gelsolin segment 1-actin complex and the mechanism of filament severing. *Nature* [Internet]. 1993;364(6439):685–92. Available from: <http://www.nature.com/doi/10.1038/364685a0>
25. Murakami K, Yasunaga T, Noguchi TQP, Gomibuchi Y, Ngo KX, Uyeda TQP, et al. Structural Basis for Actin Assembly, Activation of ATP Hydrolysis, and Delayed Phosphate Release. *Cell*. 2010;143(2):275–87.
26. Aguda AH, Xue B, Irobi E, Pr at T, Robinson RC. The Structural Basis of Actin Interaction with Multiple WH2/Thymosin Motif-Containing Proteins. *Structure* [Internet]. 2017 Sep 24;14(3):469–76. Available from: <http://dx.doi.org/10.1016/j.str.2005.12.011>
27. Morton WM, Ayscough KR, McLaughlin PJ. Latrunculin alters the actin-monomer subunit interface to prevent polymerization. *Nat Cell Biol*. 2000;2(6):376–8.
28. Porta JC, Borgstahl GEO. Structural basis for profilin-mediated actin nucleotide exchange. *J Mol Biol*. 2012;418(1–2):103–16.
29. Rizvi SA, Tereshko V, Kossiakoff AA, Kozmin SA. Structure of bistramide A-actin complex at a 1.35 ?? resolution. *J Am Chem Soc*. 2006;128(12):3882–3.
30. Otterbein LR. The Crystal Structure of Uncomplexed Actin in the ADP State. *Science* (80- ) [Internet]. 2001;293(5530):708–11. Available from: <http://www.sciencemag.org/cgi/doi/10.1126/science.1059700>
31. Allingham JS, Zampella A, D’Auria MV, Rayment I. Structures of microfilament destabilizing toxins bound to actin provide insight into toxin design and activity. *Proc Natl Acad Sci U S A* [Internet]. 2005;102(41):14527–32. Available from: [http://www.pnas.org/search?tmonth=&pubdate\\_year=2005&submit=yes&submit=Submit&submit=yes&andorexacttitle=and&format=standard&firstpage=14527&fmonth=&title=&year=&hits=10&titleabstract=&volume=102&sortspec=relevance&andorexacttitleabs=and&author2=&tocsect](http://www.pnas.org/search?tmonth=&pubdate_year=2005&submit=yes&submit=Submit&submit=yes&andorexacttitle=and&format=standard&firstpage=14527&fmonth=&title=&year=&hits=10&titleabstract=&volume=102&sortspec=relevance&andorexacttitleabs=and&author2=&tocsect)
32. Allingham JS, Miles CO, Rayment I. A Structural Basis for Regulation of Actin Polymerization by Pectenotoxins. *J Mol Biol*. 2007;371(4):959–70.
33. Rould MA, Wan Q, Joel PB, Lowey S, Trybus KM. Crystal structures of expressed non-polymerizable monomeric actin in the ADP and ATP states. *J Biol Chem*. 2006;281(42):31909–19.
34. Nair UB, Joel PB, Wan Q, Lowey S, Rould MA, Trybus KM. Crystal Structures of Monomeric Actin Bound to Cytochalasin D. *J Mol Biol*. 2008;384(4):848–64.
35. Graceffa P, Dominguez R. Crystal structure of monomeric actin in the ATP state: Structural basis of nucleotide-dependent actin dynamics. *J Biol Chem*. 2003;278(36):34172–80.
36. Kudryashov DS, Sawaya MR, Adisetiyo H, Norcross T, Hegyi G, Reisl er E, et al. The crystal structure of a cross-linked actin dimer suggests a detailed molecular interface in F-actin. *Proc Natl Acad Sci U S A* [Internet]. 2005;102(37):13105–10. Available from: <http://www.pnas.org/content/102/37/13105>
37. Boczkowska M, Rebowski G, Kremneva E, Lappalainen P, Dominguez R. How Leiomodin and Tropomodulin use a common fold for different actin assembly functions. *Nat Commun* [Internet]. 2015;6(May):8314. Available from: <http://www.nature.com/doi/10.1038/ncomms9314>
38. Grintsevich EE, Ge P, Sawaya MR, Yesilyurt HG, Terman JR, Zhou ZH, et al. Catastrophic disassembly of actin filaments via Mical-mediated oxidation. *Nat Commun*. 2017;8(1).
